# Supplementary material for: Presence of Concurrent TP53 Mutations Is Necessary to Predict Poor Outcomes within the SMAD4 Mutated Subgroup of Metastatic Colorectal Cancer
Source: MDPI journal article supplement (doi:10.3390/cancers14153644), 2022-07-27

Supplementary Figure S1. Kaplan-Meier Curves for overall survival of metastatic colorectal cancer patients by *RAS* and *TP53* status

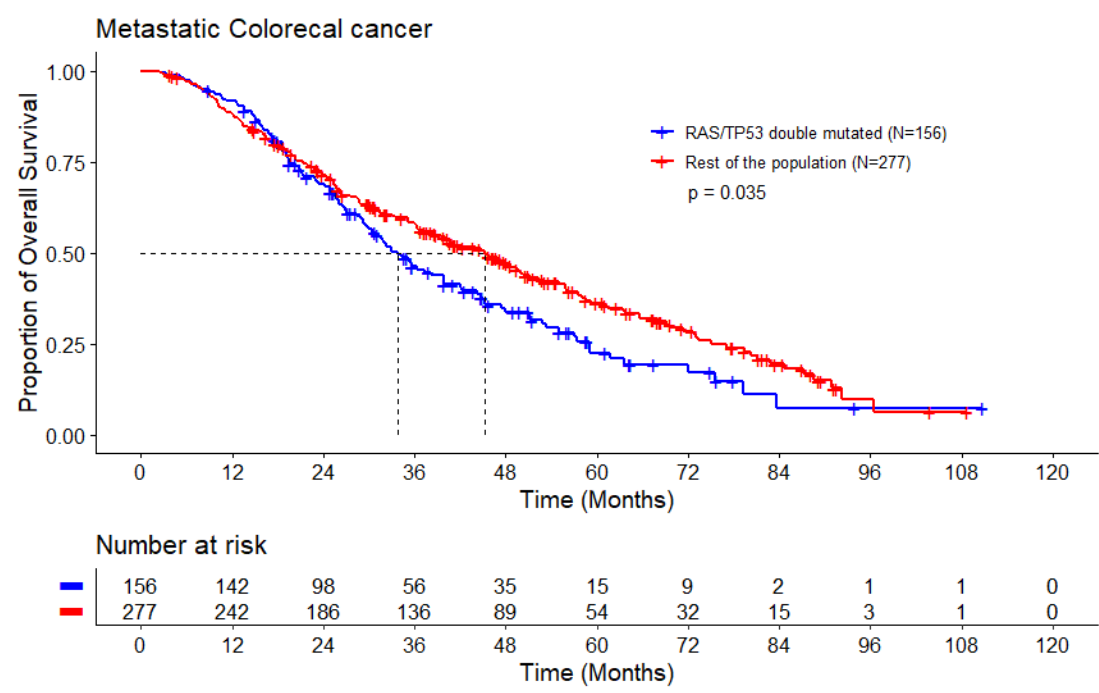

Supplementary Figure S2. Kaplan-Meier Curves for overall survival of metastatic colorectal cancer patients by *TP53* status

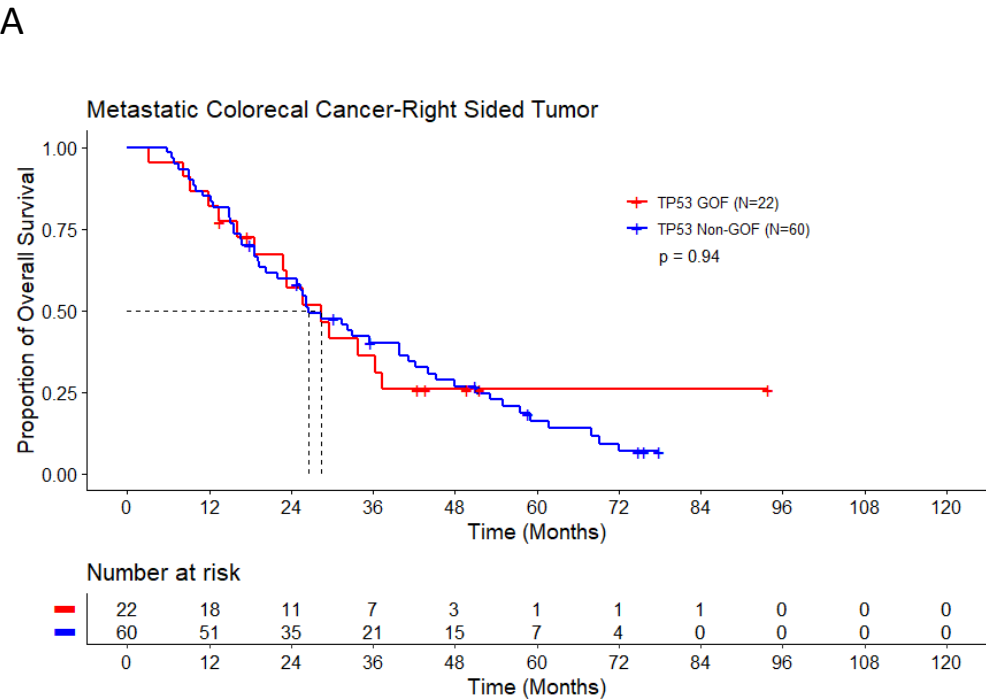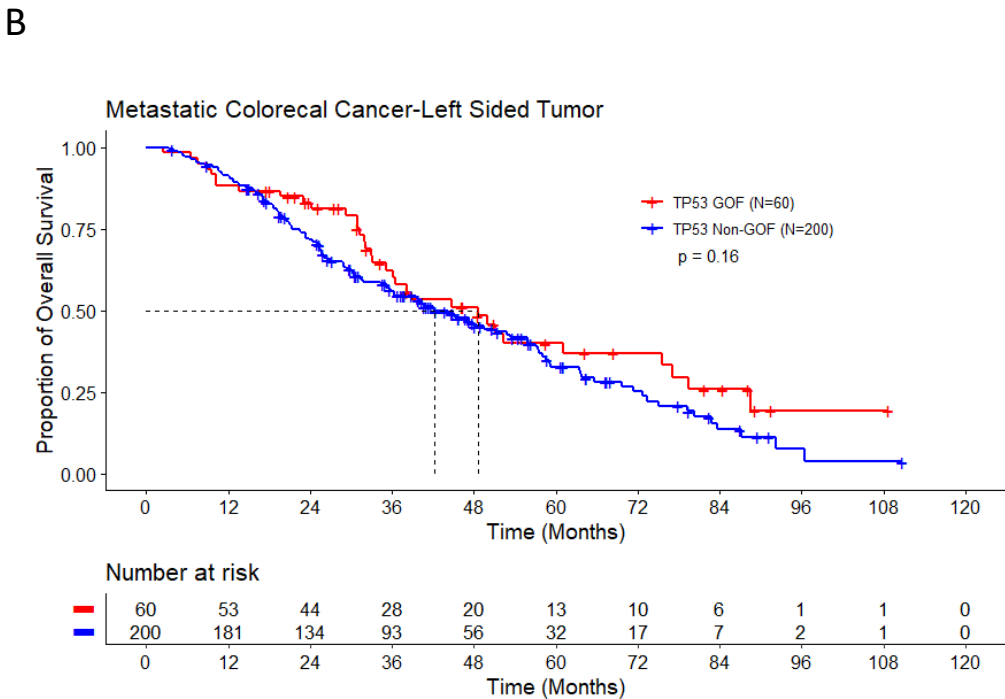

Supplementary Figure S3. Kaplan-Meier Curves for overall survival of metastatic colorectal cancer patients by *SMAD4* and *TP53* status

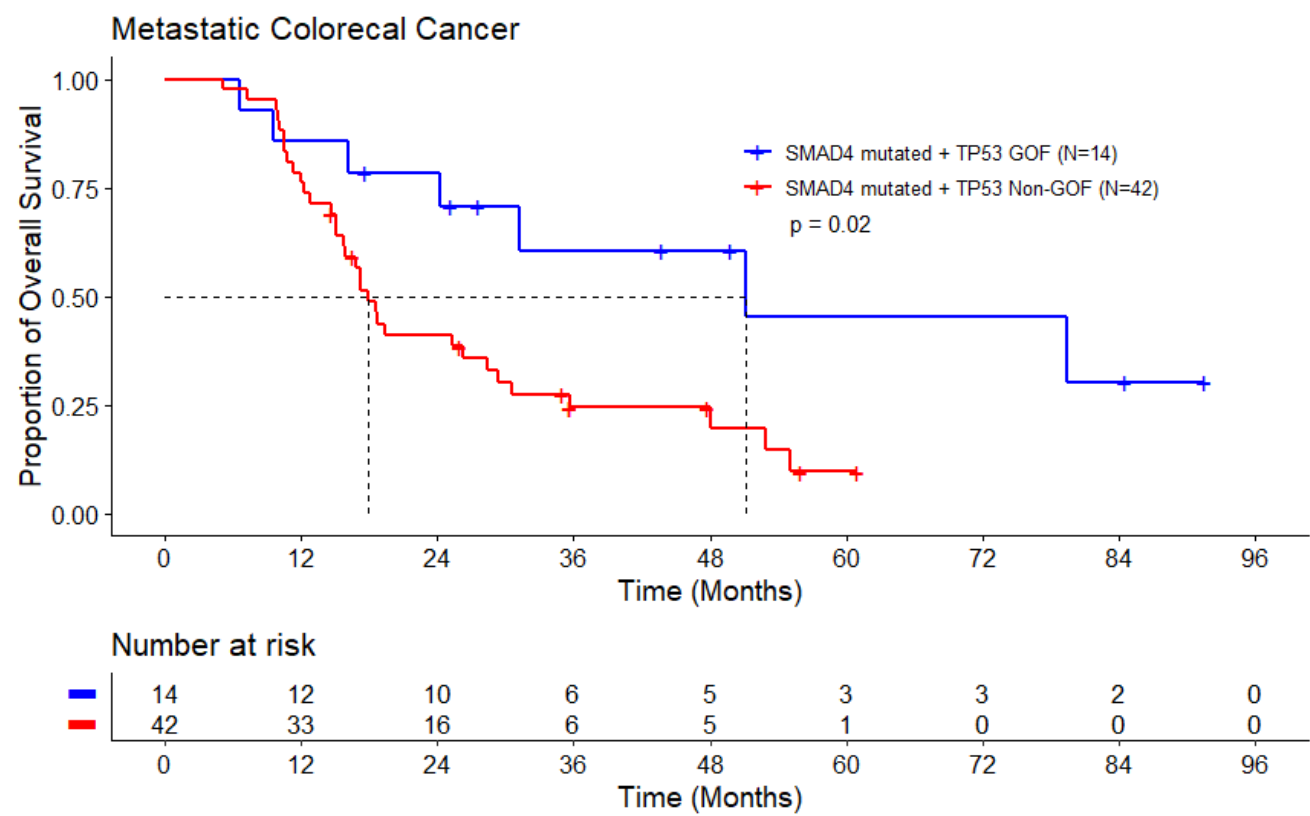

Supplement: s1 [file s1]
