# Supplementary material for: Presence of Concurrent TP53 Mutations Is Necessary to Predict Poor Outcomes within the SMAD4 Mutated Subgroup of Metastatic Colorectal Cancer
Source: MDPI journal article supplement (doi:10.3390/cancers14153644), 2022-07-27
Supplement: s1 [file s1]

**Table S1.** Univariate survival model analysis for OS in 433 patients.

| Clinicopathogenic variables | COH cohort (n=433) |        |       |         |
|-----------------------------|--------------------|--------|-------|---------|
|                             |                    | 95% CI |       |         |
|                             | HR                 | Lower  | Upper | P-value |
| Age at diagnosis (years)    |                    |        |       |         |
| ≥65 vs. <65                 | 1.13               | 0.86   | 1.48  | 0.38    |
| Gender                      |                    |        |       |         |
| Male vs. Female             | 1.13               | 0.89   | 1.43  | 0.32    |
| Sidedness                   |                    |        |       |         |
| Right vs. Left              | 1.47               | 1.14   | 1.89  | 0.00    |
| <i>RAS</i>                  |                    |        |       |         |
| Mutated vs. Non-mutated     | 1.15               | 0.91   | 1.46  | 0.24    |
| <i>BRAF<sup>V600E</sup></i> |                    |        |       |         |
| Mutated vs. Non-mutated     | 1.72               | 1.13   | 2.62  | 0.01    |
| <i>APC</i>                  |                    |        |       |         |
| Mutated vs. Non-mutated     | 0.71               | 0.55   | 0.92  | 0.01    |
| <i>TP53</i>                 |                    |        |       |         |
| Mutated vs. Non-mutated     | 1.17               | 0.87   | 1.58  | 0.31    |
| <i>SMAD4</i>                |                    |        |       |         |
| Mutated vs. Non-mutated     | 1.31               | 0.95   | 1.80  | 0.10    |

**Table S2.** Univariate survival model analysis for OS in patients with *SMAD4* mutation.

| Clinicopathogenic variables | SMAD4-MT cohort (n=70) |        |       |         |
|-----------------------------|------------------------|--------|-------|---------|
|                             |                        | 95% CI |       |         |
|                             | HR                     | Lower  | Upper | P-value |
| <i>RAS</i>                  |                        |        |       |         |
| Mutated vs. Non-mutated     | 0.98                   | 0.54   | 1.76  | 0.94    |
| <i>BRAF<sup>V600E</sup></i> |                        |        |       |         |
| Mutated vs. Non-mutated     | 1.55                   | 0.65   | 3.68  | 0.32    |
| <i>APC</i>                  |                        |        |       |         |
| Mutated vs. Non-mutated     | 0.68                   | 0.38   | 1.23  | 0.20    |
| <i>TP53</i>                 |                        |        |       |         |
| Mutated vs. Non-mutated     | 2.74                   | 1.15   | 6.52  | 0.02    |

**Table S3.** Multivariate survival model analysis for OS in patients without *SMAD4* mutation.

| Clinicopathogenic variables | SMAD4-WT cohort (n=363) |        |       |         |
|-----------------------------|-------------------------|--------|-------|---------|
|                             |                         | 95% CI |       |         |
|                             | HR                      | Lower  | Upper | P-value |
| <i>RAS</i>                  |                         |        |       |         |
| Mutated vs. Non-mutated     | 1.26                    | 0.96   | 1.66  | 0.10    |
| <i>BRAF<sup>V600E</sup></i> |                         |        |       |         |
| Mutated vs. Non-mutated     | 1.64                    | 0.95   | 2.84  | 0.08    |
| <i>APC</i>                  |                         |        |       |         |
| Mutated vs. Non-mutated     | 0.80                    | 0.58   | 1.10  | 0.17    |
| <i>TP53</i>                 |                         |        |       |         |
| Mutated vs. Non-mutated     | 1.10                    | 0.79   | 1.53  | 0.57    |
